# Supplementary material for: Orbitally forced environmental changes during the accumulation of a Pliensbachian (Lower Jurassic) black shale in northern Iberia
Source: Copernicus journal article supplement (doi:10.5194/cp-20-1659-2024), 2024-07-29
Supplement: Supplementary file 1 [file cp-20-1659-2024-supplement.pdf]

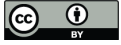

*Supplement of*

## **Orbitally forced environmental changes during the accumulation of a Pliensbachian (Lower Jurassic) black shale in northern Iberia**

**Narora Martinez-Braceras et al.**

*Correspondence to:* Narora Martinez-Braceras ([narora.martinez@ehu.eus](mailto:narora.martinez@ehu.eus))

The copyright of individual parts of the supplement might differ from the article licence.

## List of Figures

|                |   |
|----------------|---|
| Figure S1..... | 1 |
| Figure S2..... | 2 |
| Figure S3..... | 3 |
| Figure S4..... | 4 |
| Figure S5..... | 5 |
| Figure S6..... | 6 |

## List of Tables

|               |    |
|---------------|----|
| Table S1..... | 7  |
| Table S2..... | 14 |
| Table S3..... | 15 |
| Table S4..... | 17 |
| Table S5..... | 19 |

Figure S1. A) Geological map of the Santiurde de Reinosa area, where the herein studied motorway section (B) and the train station section studied by others (C) are located. Calcareous couplets in both Santiurde outcrops are numbered in white and bundles B8-B11 in green. Bed by-bed correlation between separate and discontinuous outcrops was carried out on visual grounds, by the identification of key beds with distinctive sedimentary features (mainly lithology and thickness) and characteristic bed arrangements in the succession.

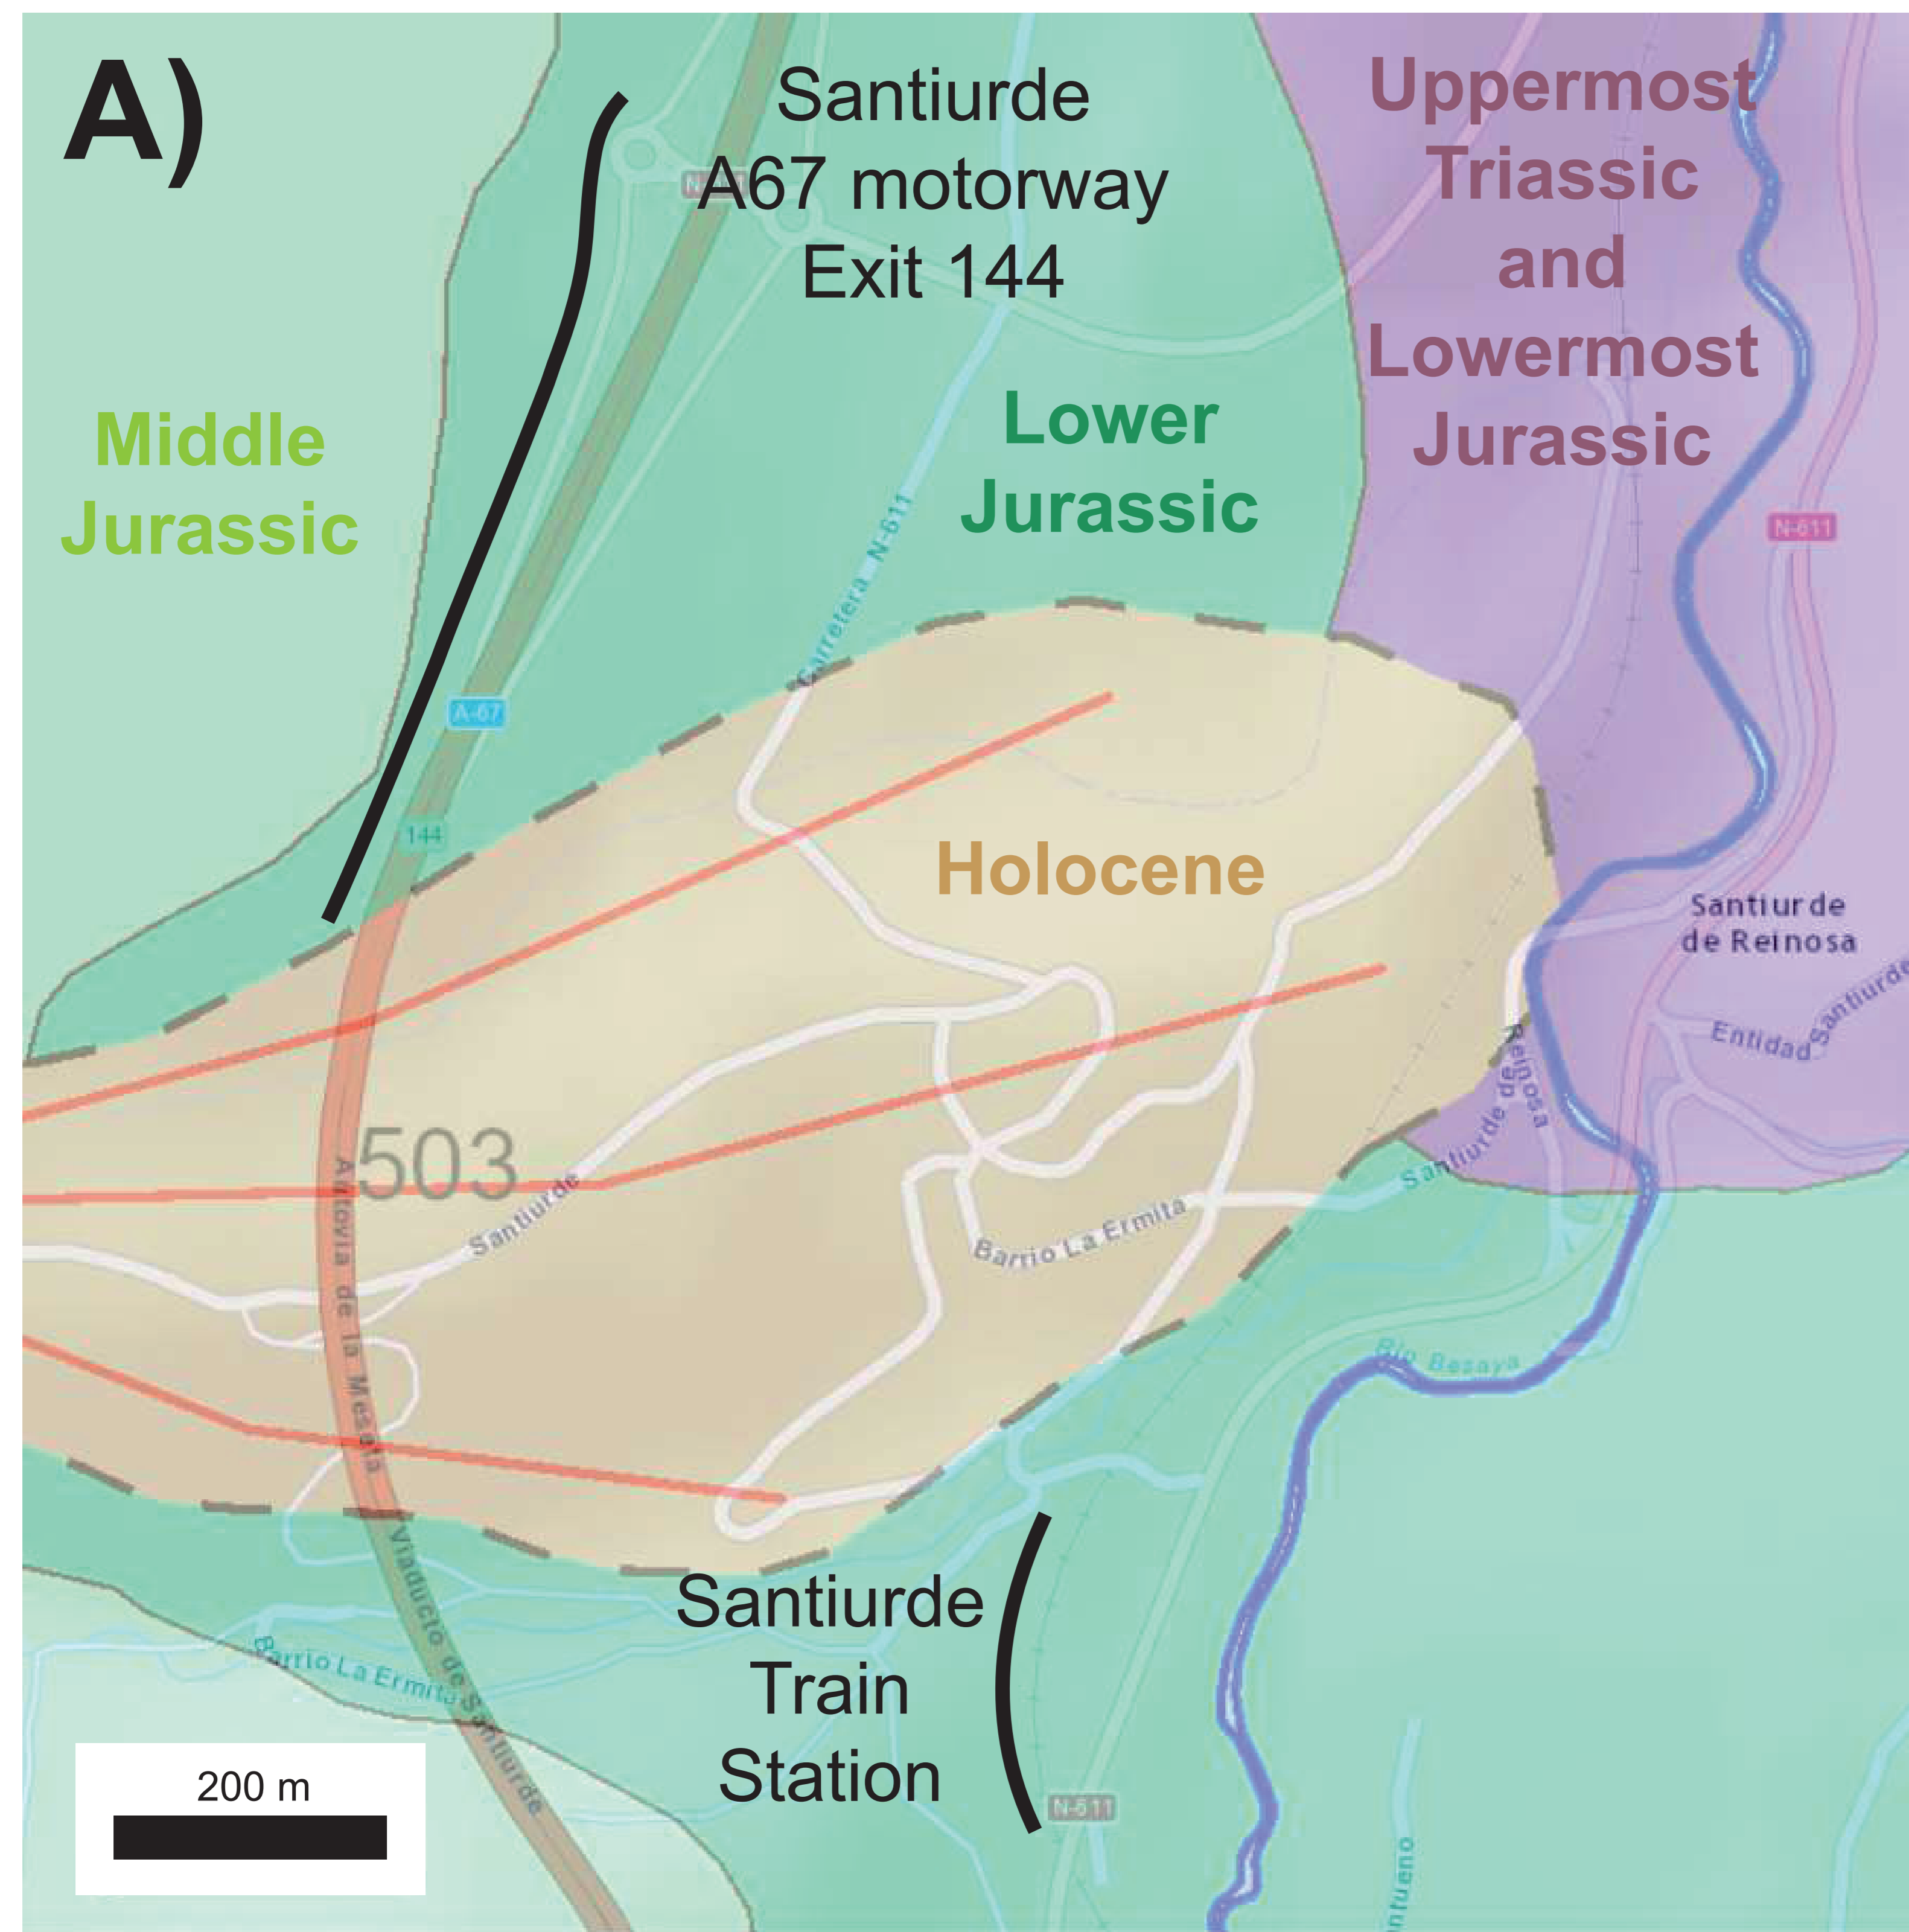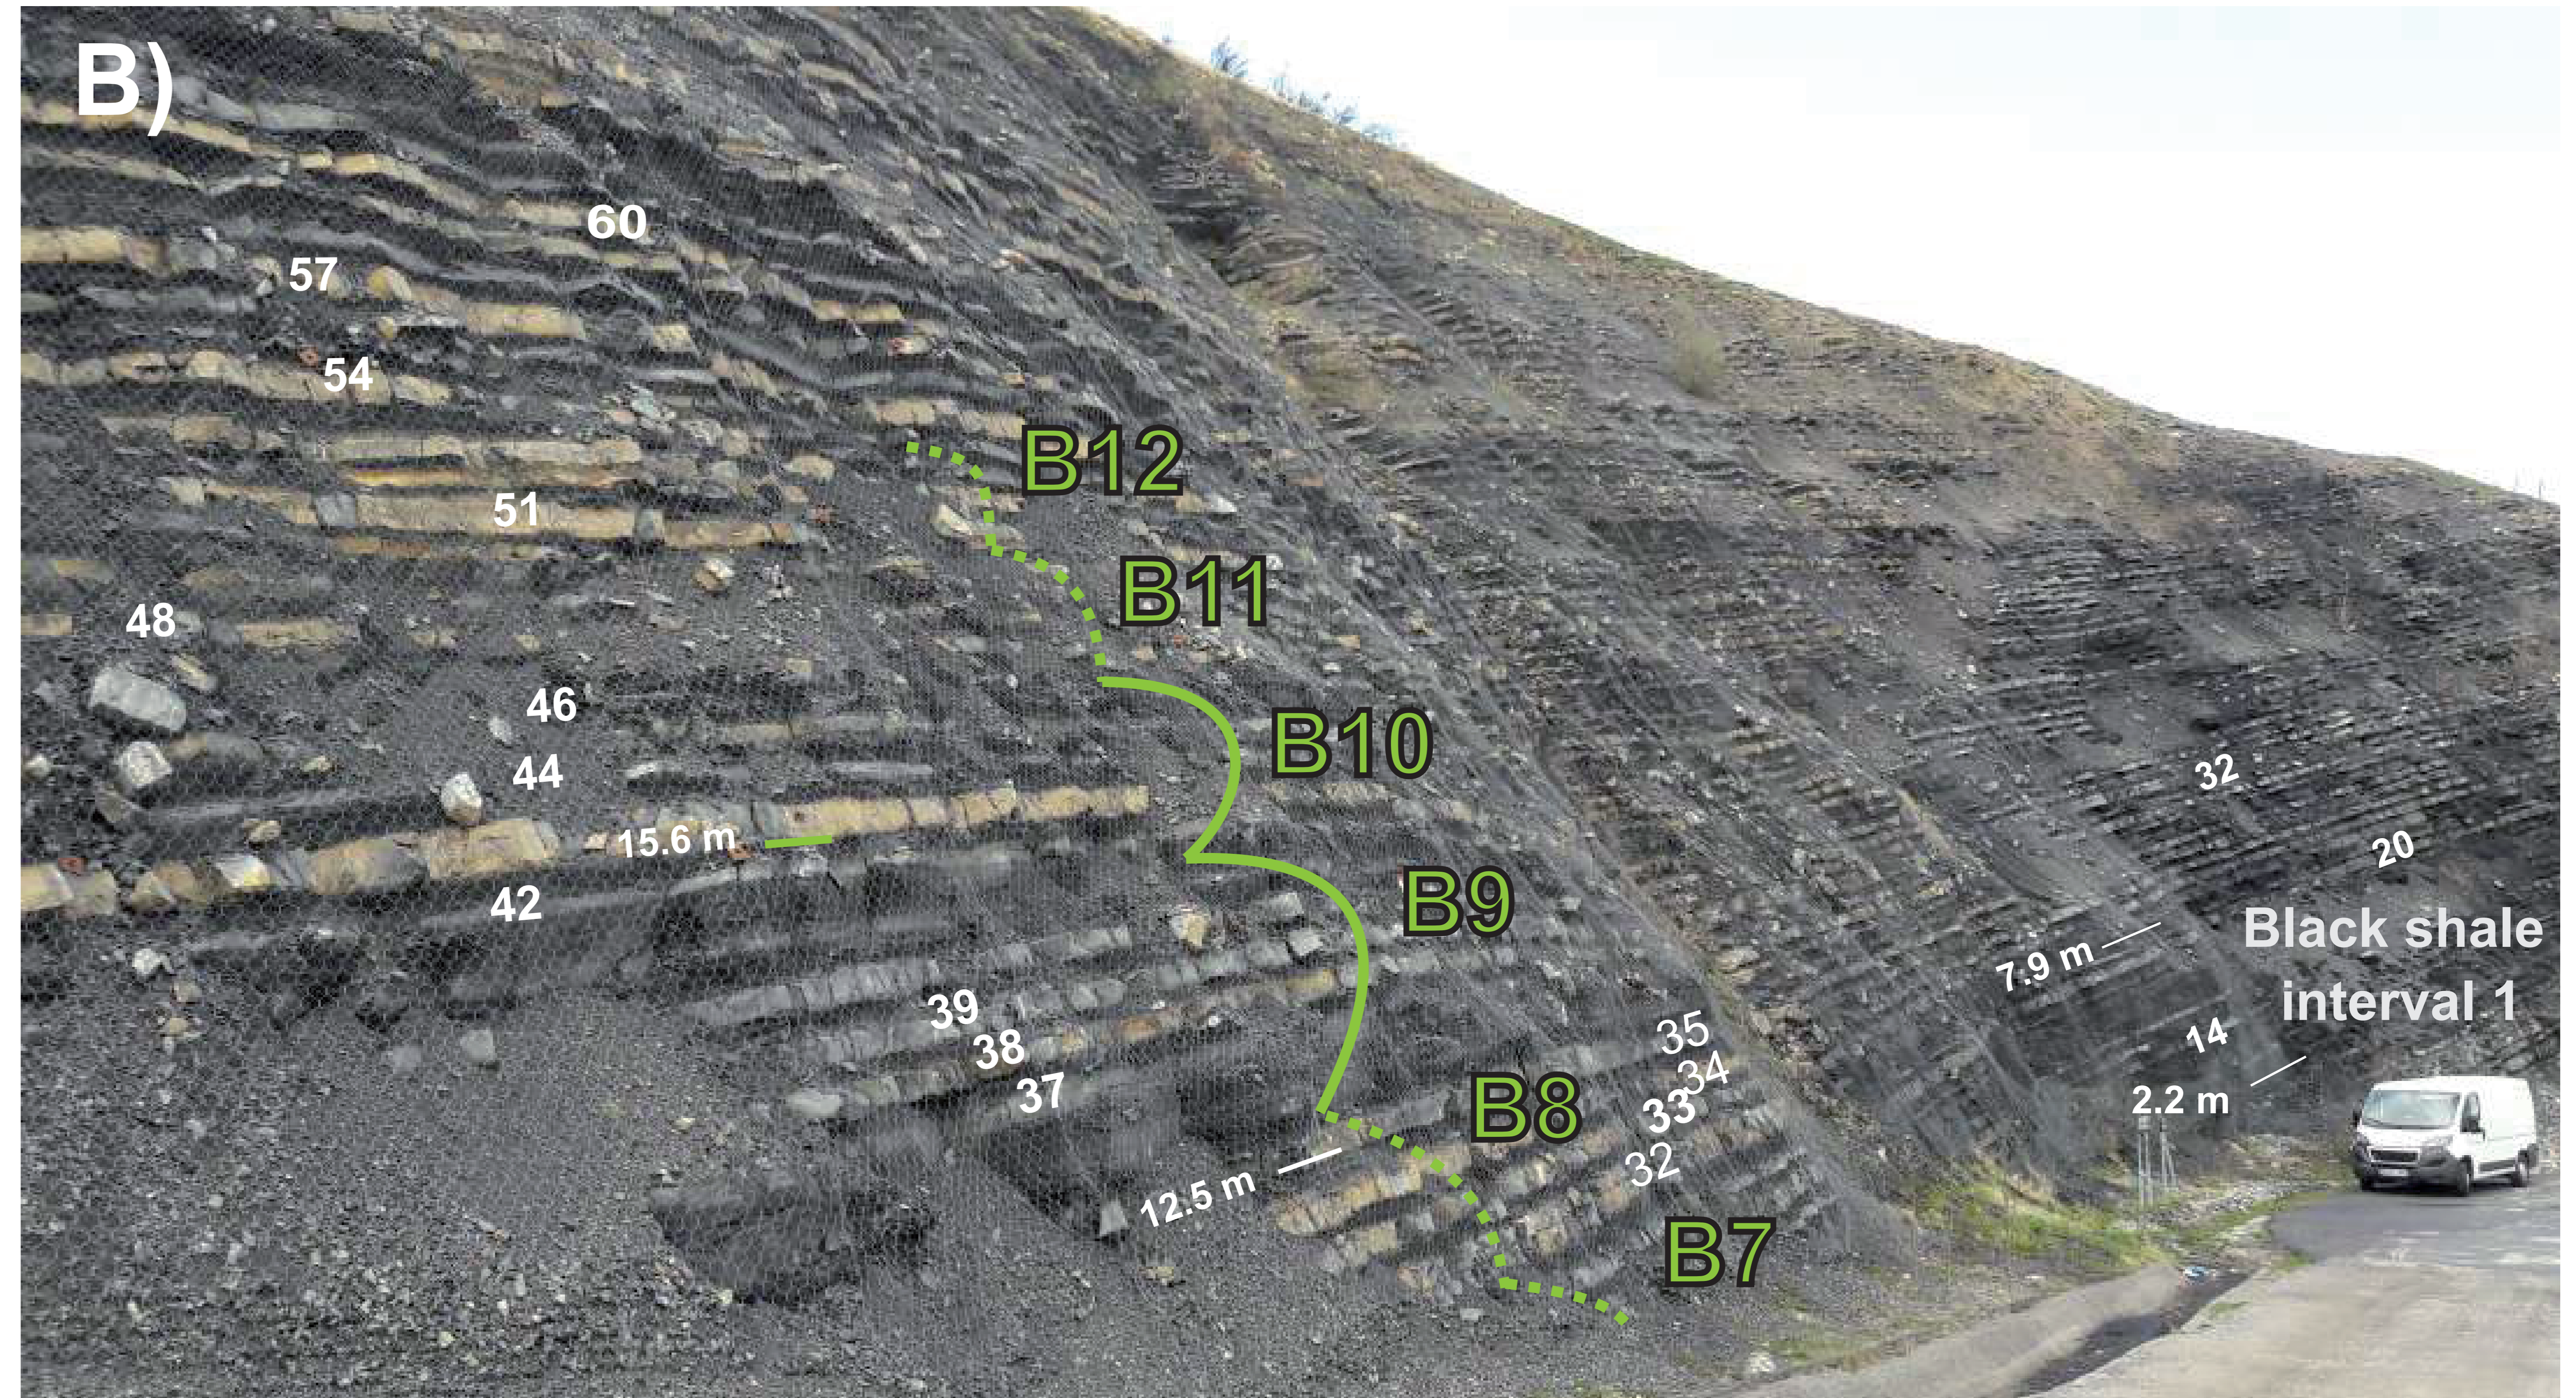

Santiurde de Reinosa (motorway)

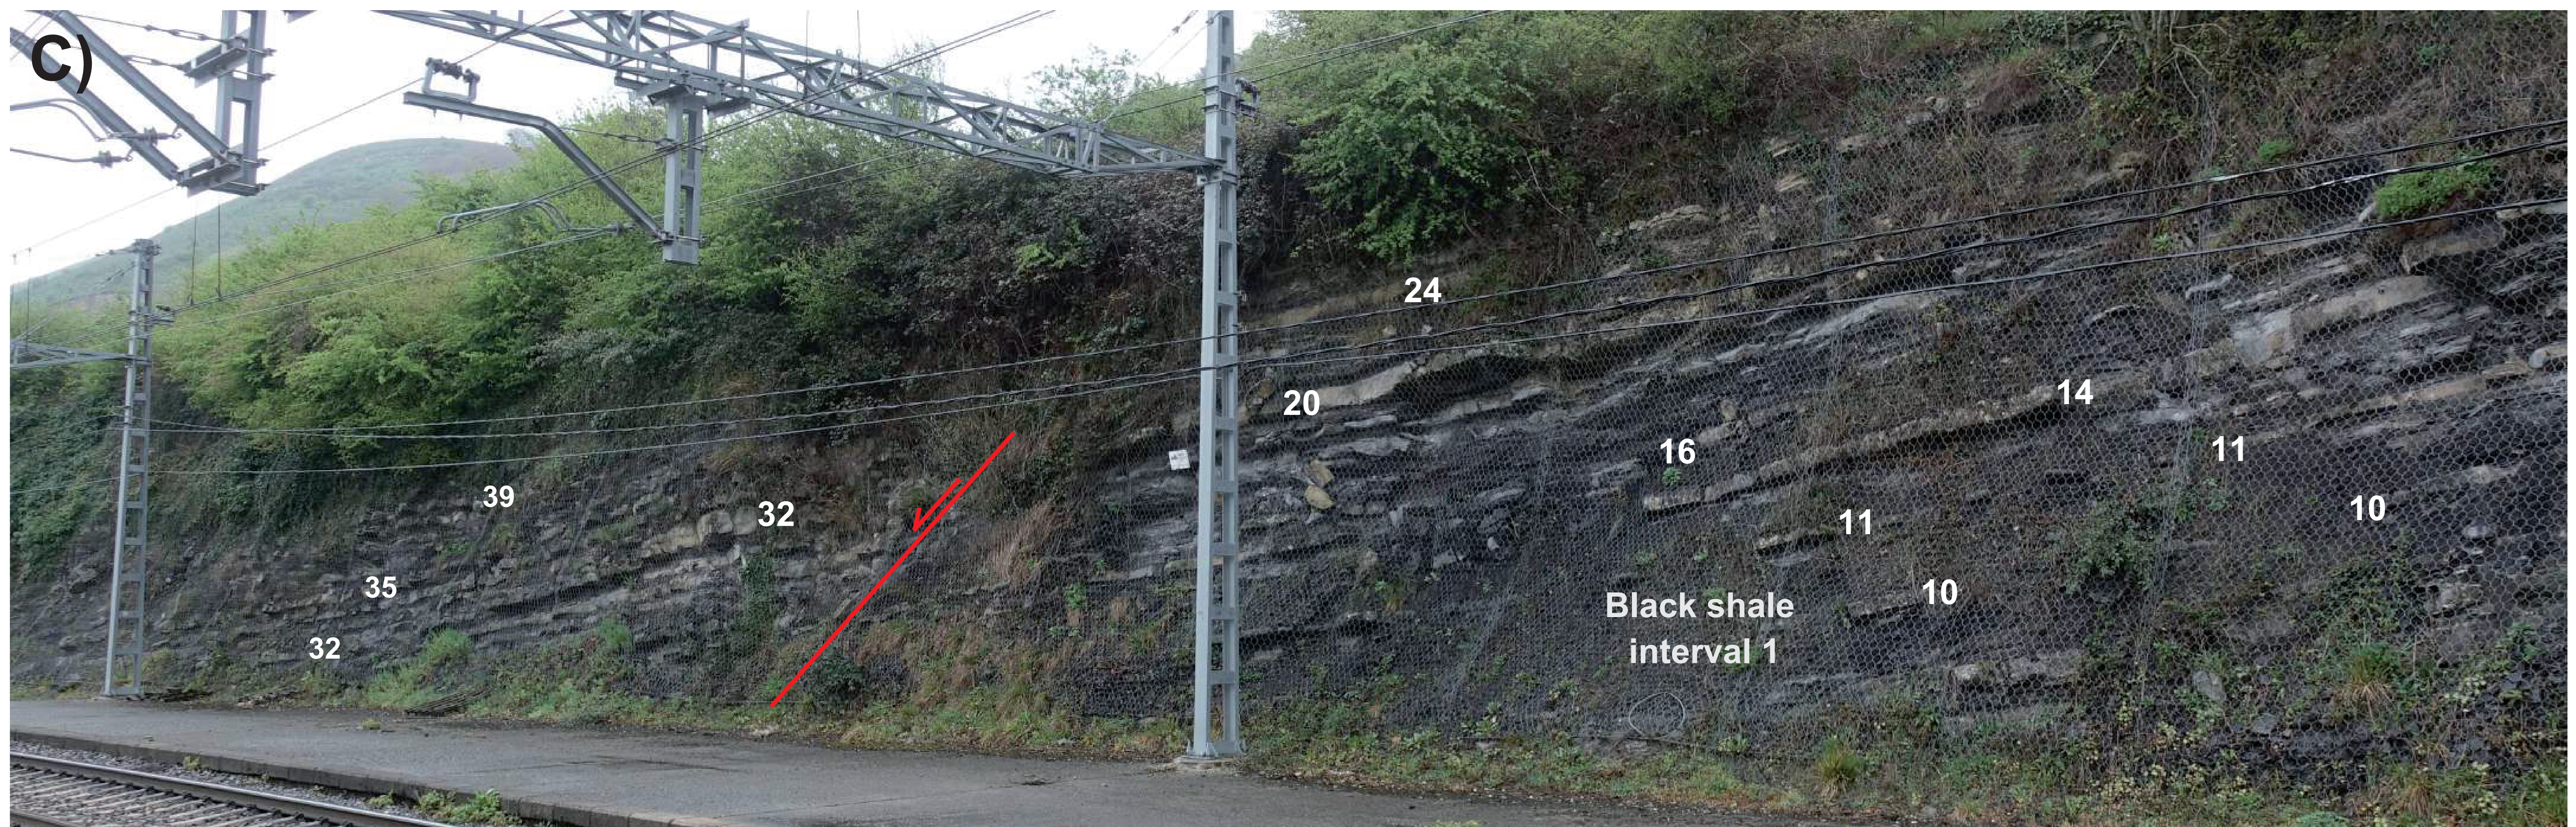

Santiurde de Reinosa (train station)

Figure S2. Stratigraphic log and chronostratigraphy of the studied section, showing the MS and colour data curves. Bundles (B) and couplets (C) identified in the sedimentary alternation are numbered in ascending stratigraphic order. The grey background shows the extent of the Uptonia jamesoni Black Shale 1, and the pink interval in its upper part shows the interval studied herein in detail. Close-ups of the colour and %CaCO<sub>3</sub> curves of the interval studied in detail are shown, as well as the crossplot of both variables and their Pearson correlation value (r). Crossplots of colour vs MS of the complete section and %CaCO<sub>3</sub> vs MS of the interval studied in detail are also shown.

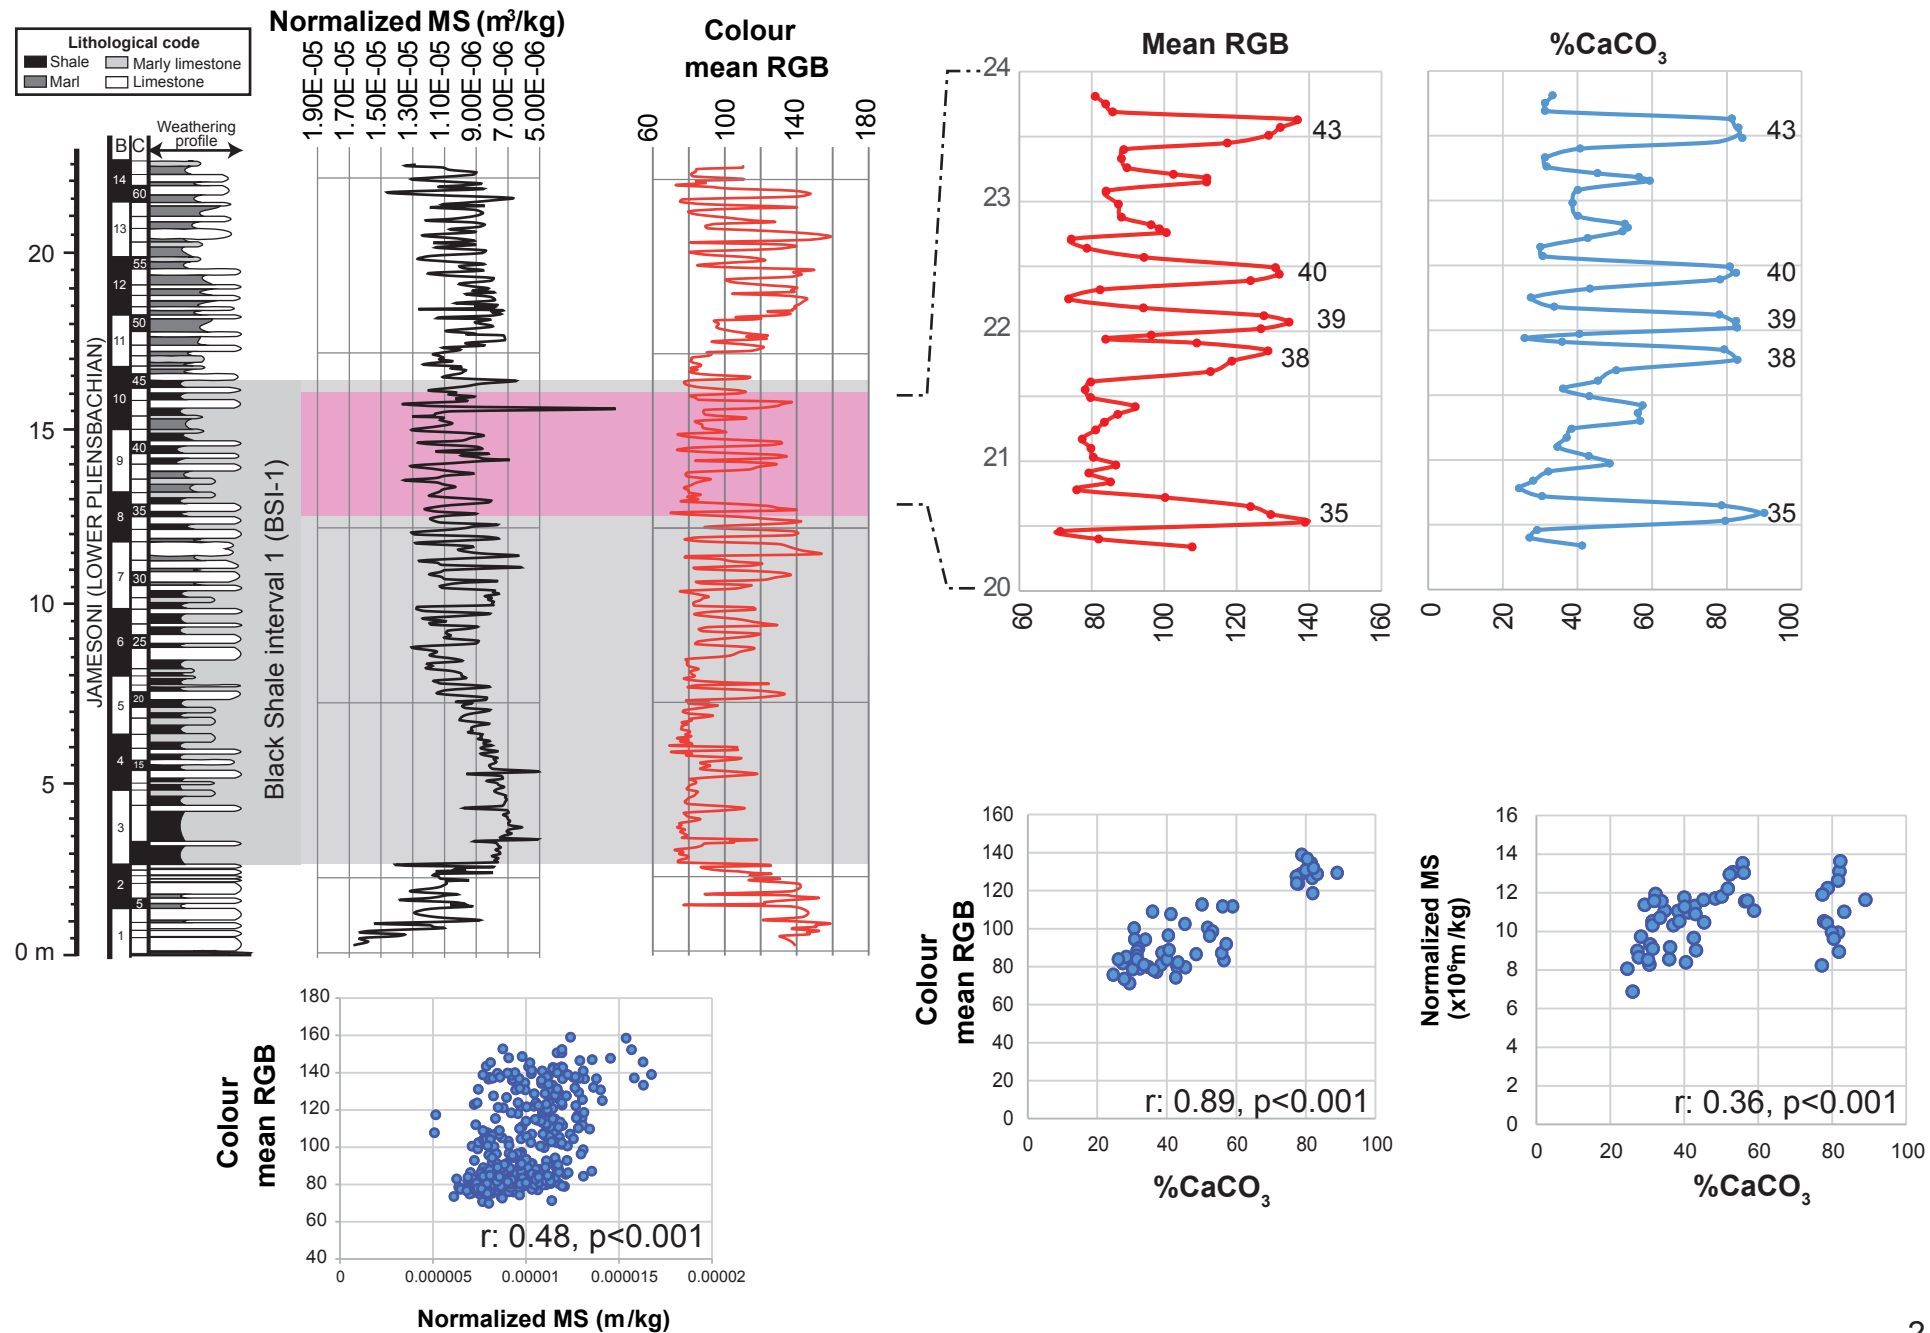

Figure S3. A) Thermomagnetic curve of a limestone sample (C43L) indicating the presence of an original ferromagnetic phase (magnetite). Secondary magnetic iron sulfides (pyrrhotite?) are created upon heating the sample up to 700°C as inferred from the cooling curve. B) Isothermal remanent magnetization (IRM) acquisition curves for a limestone (C43L) and marl (C43M) samples compatible with magnetite as the ferromagnetic carrier. Note the higher saturation remanence for the limestone sample.

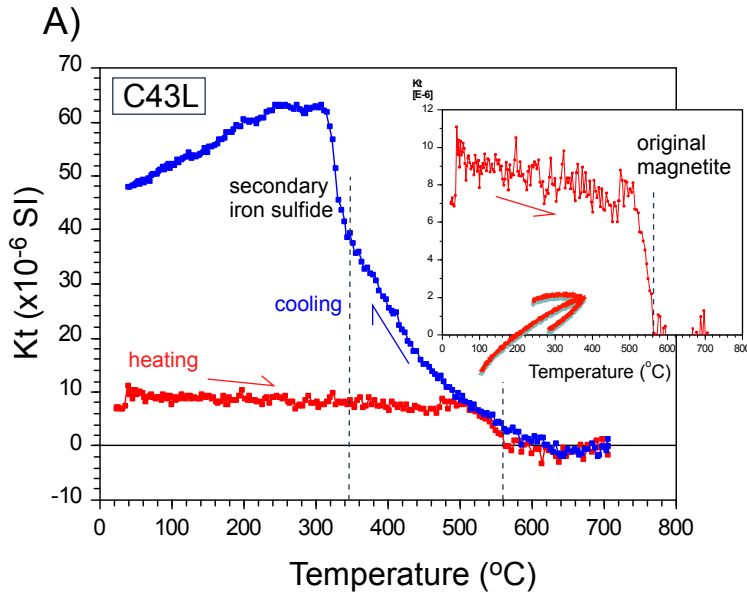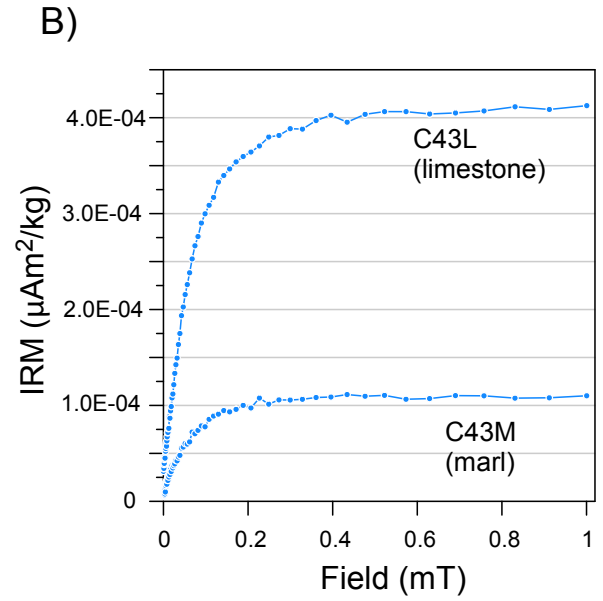

Figure S4. Stratigraphic log and chronostratigraphy of the studied section, showing the detrended MS curve. Bundles (B) and couplets (C) identified in the sedimentary alternation are numbered in ascending stratigraphic order. The 2n-MTM and EHA spectra of the MS data series are presented. Limestones usually present higher magnetic susceptibility values than adjacent marls/shales. However, the MS data series displays a greater dispersion and a spikier appearance than the colour and %CaCO<sub>3</sub> data series, which very likely explains the low correlation coefficient between the MS data series and the colour and %CaCO<sub>3</sub> data series (Fig. S2). The MS signal is mainly carried by magnetite content (Fig.S3), which could be either detrital in origin or related to postdepositional changes in redox state. The influence of early diagenetic processes, such as partial replacement of pyrite with iron oxides at more oxygenated conditions, might explain the high variability of the MS curve. Notwithstanding the potential flaws of the MS data series, the spectral analysis shows that it records a significant periodicity with an average thickness equivalent to that of precession couplets. Despite being less prominent, cycles correlatable with those attributed to obliquity(?), short eccentricity (bundles) and long eccentricity in the colour spectral analysis series can also be identified in the MS spectra.

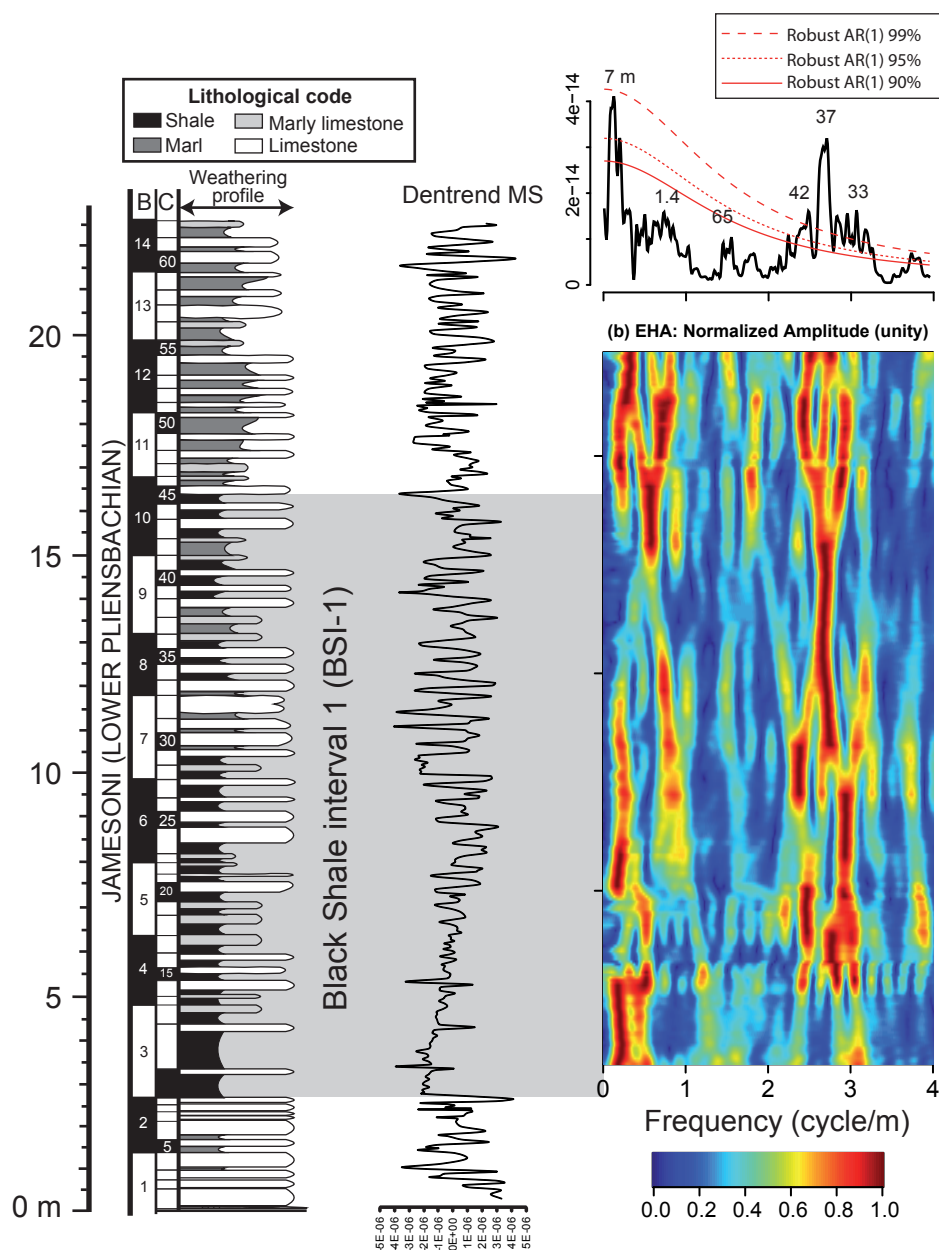

Figures S5. A) Bulk stable isotope composition of the Santiurde succession. Note that samples are organized following the normal diagenetic trend controlled by local carbonate dissolution and reprecipitation during burial. B) Crossplot of  $\delta^{13}\text{C}_{\text{carb}}$  and  $\% \text{CaCO}_3$  content of the interval studied in detail (limestone and marly limestone samples: white dots; marl and shale samples: black dots).

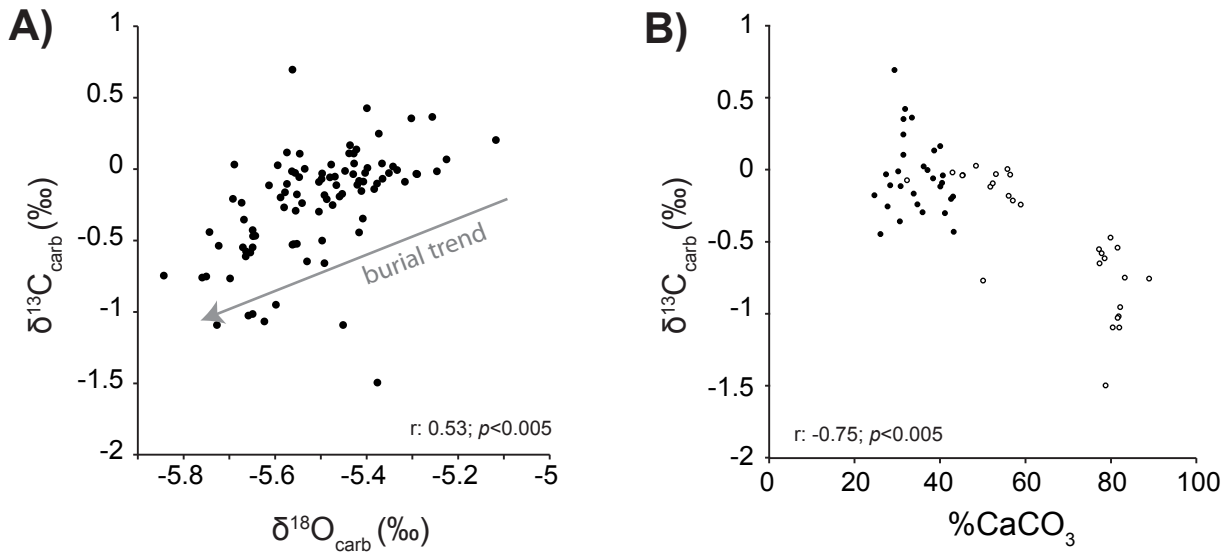

Figure S6. Crossplots between several diagenetic sensitive elements (Fe, Mn, Sr and  $^{18}\text{O}_{\text{carb}}$ ).

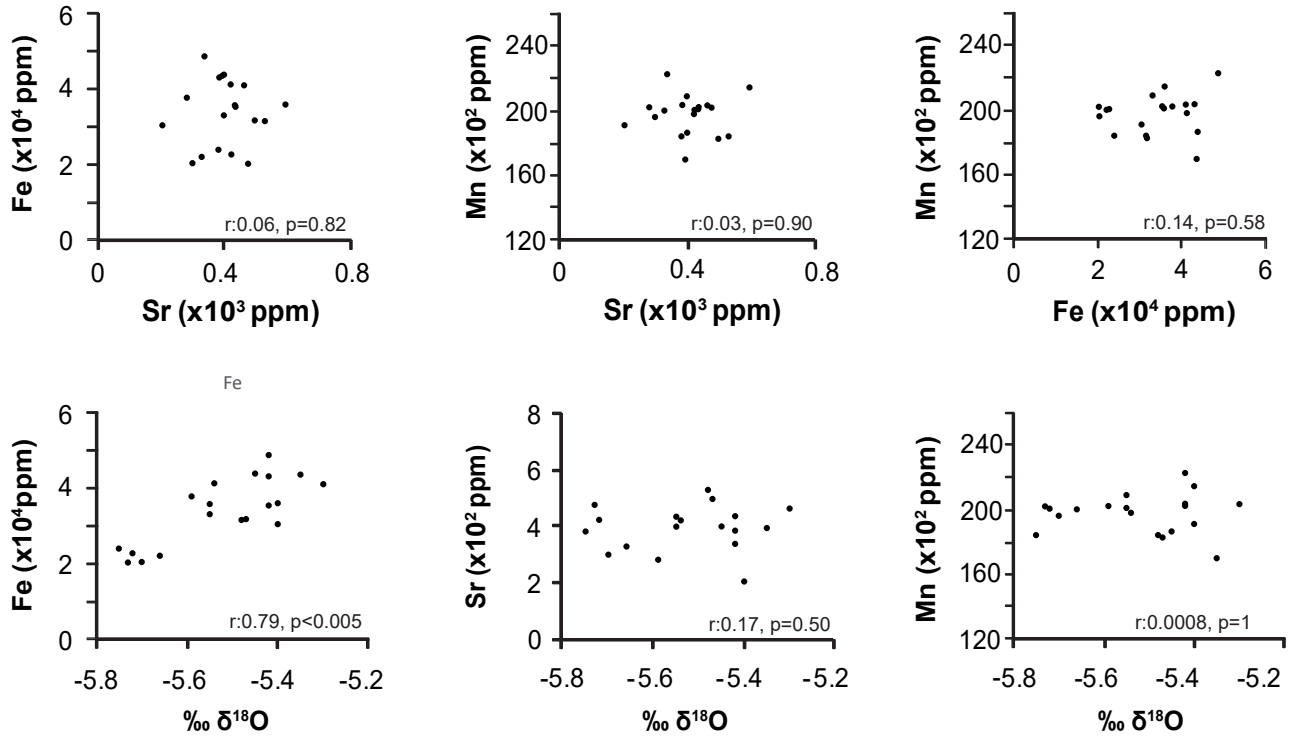



Table S1. Stratigraphic location of the Santiurde samples and their mass-normalized low-field magnetic susceptibility (MS) and colours (mean RGB) values.

| Stratigraphic level (m) | Sample Label | Normalized Ms (m3/kg) | Colour (mean RGB) |
|-------------------------|--------------|-----------------------|-------------------|
| 0.17                    | ST99         | 1.67442E-05           | 138.99            |
| 0.27                    | ST100        | 1.5824E-05            | 137.081           |
| 0.37                    | ST101        | 1.63145E-05           | 133.206           |
| 0.43                    | ST102        | 1.40087E-05           | 130.76            |
| 0.48                    | ST103        | 1.35599E-05           | 146.978           |
| 0.53                    | ST104        | 1.62909E-05           | 145.736           |
| 0.58                    | ST105        | 1.56725E-05           | 152.26            |
| 0.63                    | ST106        | 1.25637E-05           | 137.437           |
| 0.66                    | ST107        | 1.10402E-05           | 137.996           |
| 0.69                    | ST108        | 1.16674E-05           | 150.653           |
| 0.74                    | ST109        | 1.19349E-05           | 150.601           |
| 0.79                    | ST110        | 1.53759E-05           | 158.476           |
| 0.85                    | ST111        | 1.0282E-05            | 139.377           |
| 0.89                    | ST112        | 8.77446E-06           | 121.155           |
| 0.97                    | ST113        | 1.14479E-05           | 142.776           |
| 1.09                    | ST114        | 1.29006E-05           | 146.484           |
| 1.21                    | ST115        | 1.19065E-05           | 143.122           |
| 1.28                    | ST116        | 9.27092E-06           | 135.905           |
| 1.32                    | ST117        | 1.0636E-05            | 77.076            |
| 1.35                    | ST118        | 9.71365E-06           | 121.982           |
| 1.4                     | ST119        | 1.04224E-05           | 121.994           |
| 1.46                    | ST120        | 1.37901E-05           | 136.69            |
| 1.52                    | ST121        | 1.19297E-05           | 152.407           |
| 1.57                    | ST122        | 1.11972E-05           | 138.032           |
| 1.6                     | ST123        | 1.08411E-05           | 134.172           |
| 1.63                    | ST124        | 1.02444E-05           | 88.85             |
| 1.71                    | ST125        | 1.31528E-05           | 136.667           |
| 1.82                    | ST126        | 1.14434E-05           | 142.014           |
| 1.93                    | ST127        | 1.08706E-05           | 140.868           |
| 2                       | ST128        | 1.08632E-05           | 113.397           |
| 2.03                    | ST129        | 9.45017E-06           | 130.765           |
| 2.06                    | ST130        | 1.12191E-05           | 118.475           |
| 2.1                     | ST131        | 1.13269E-05           | 115.795           |
| 2.13                    | ST132        | 1.139E-05             | 114.045           |
| 2.16                    | ST133        | 1.17406E-05           | 125.946           |
| 2.19                    | ST134        | 1.15517E-05           | 115.138           |
| 2.21                    | ST135        | 7.94355E-06           | 107.688           |
| 2.23                    | ST136        | 1.15176E-05           | no data           |
| 2.25                    | ST137        | 9.75741E-06           | 97.151            |
| 2.3                     | ST138        | 1.0324E-05            | 91.159            |
| 2.33                    | ST139        | 9.77143E-06           | 87.5              |
| 2.36                    | ST140        | 7.97792E-06           | 86.845            |
| 2.4                     | ST141        | 1.30297E-05           | 125.475           |
| 2.45                    | ST142        | 1.40977E-05           | 125.018           |
| 2.5                     | ST143        | 1.17973E-05           | 105.376           |
| 2.57                    | ST144        | 7.66919E-06           | 74.267            |
| 2.6                     | ST145        | 7.8318E-06            | 74.381            |
| 2.66                    | ST146        | 7.61717E-06           | 79.095            |
| 2.72                    | ST147        | 8.00354E-06           | 79.64             |
| 2.78                    | ST148        | 7.51443E-06           | 74.741            |
| 2.84                    | ST149        | 7.54457E-06           | 76.958            |

|      |       |             |         |
|------|-------|-------------|---------|
| 2.9  | ST150 | 7.7758E-06  | 72.247  |
| 2.96 | ST151 | 7.46452E-06 | 82.71   |
| 3.02 | ST152 | 7.61998E-06 | 87.29   |
| 3.08 | ST153 | 7.70374E-06 | 88.963  |
| 3.11 | ST154 | 7.96278E-06 | 105.022 |
| 3.15 | ST155 | 9.04677E-06 | 103.19  |
| 3.19 | ST156 | 5.14505E-06 | 117.398 |
| 3.24 | ST157 | 7.46569E-06 | 76.518  |
| 3.3  | ST158 | 7.27616E-06 | 79.128  |
| 3.36 | ST159 | 6.78114E-06 | 77.547  |
| 3.42 | ST160 | 7.07834E-06 | 75.285  |
| 3.48 | ST161 | 6.89781E-06 | 77.862  |
| 3.54 | ST162 | 6.12822E-06 | 73.574  |
| 3.6  | ST163 | 6.90624E-06 | 75.942  |
| 3.66 | ST164 | 6.97805E-06 | 74.878  |
| 3.72 | ST165 | 6.87322E-06 | 82.012  |
| 3.78 | ST166 | 7.01549E-06 | 86.408  |
| 3.84 | ST167 | 7.05331E-06 | 80.169  |
| 3.9  | ST168 | 7.30004E-06 | 78.327  |
| 3.96 | ST169 | 6.95972E-06 | 77.523  |
| 4.03 | ST170 | 7.0984E-06  | 100.508 |
| 4.09 | ST171 | 9.78964E-06 | 111.107 |
| 4.15 | ST172 | 7.40183E-06 | 99.022  |
| 4.21 | ST173 | 7.23596E-06 | 79.952  |
| 4.27 | ST174 | 7.18182E-06 | 77.786  |
| 4.33 | ST175 | 7.07744E-06 | 78.835  |
| 4.39 | ST176 | 7.17207E-06 | 80.258  |
| 4.45 | ST177 | 7.14103E-06 | 83.012  |
| 4.51 | ST178 | 7.57382E-06 | 84.048  |
| 4.57 | ST179 | 7.85471E-06 | 84.834  |
| 4.63 | ST180 | 7.69114E-06 | 79.104  |
| 4.69 | ST181 | 7.25102E-06 | 79.565  |
| 4.75 | ST182 | 7.57999E-06 | 80.9    |
| 4.81 | ST183 | 7.7201E-06  | 83.913  |
| 4.87 | ST184 | 8.33228E-06 | 83.611  |
| 4.93 | ST185 | 7.33936E-06 | 80.676  |
| 5.01 | ST186 | 7.44357E-06 | 102.363 |
| 5.07 | ST187 | 9.56652E-06 | 117.983 |
| 5.13 | ST188 | 5.0797E-06  | 107.729 |
| 5.21 | ST1   | 7.93595E-06 | 86.807  |
| 5.31 | ST2   | 8.18208E-06 | 91.896  |
| 5.4  | ST3   | 7.74231E-06 | 86.796  |
| 5.49 | ST4   | 7.89123E-06 | 106.569 |
| 5.53 | ST5   | 7.6837E-06  | 108.867 |
| 5.6  | ST6   | 8.4713E-06  | 78.804  |
| 5.65 | ST7   | 8.70157E-06 | 81.74   |
| 5.71 | ST8   | 7.66247E-06 | 70.821  |
| 5.76 | ST9   | 8.37142E-06 | 107.116 |
| 5.8  | ST10  | 8.71512E-06 | 105.015 |
| 5.84 | ST11  | 8.55031E-06 | 106.704 |
| 5.88 | ST12  | 8.00334E-06 | 69.866  |
| 5.92 | ST13  | 8.50249E-06 | 81.675  |
| 5.97 | ST14  | 8.50998E-06 | 80.325  |
| 6.01 | ST15  | 8.16175E-06 | 75.16   |
| 6.06 | ST16  | 8.87086E-06 | 79.528  |
| 6.1  | ST17  | 8.67142E-06 | 73.414  |

|      |       |             |         |
|------|-------|-------------|---------|
| 6.15 | ST18  | 8.72787E-06 | 81.323  |
| 6.2  | ST19  | 8.62469E-06 | 78.148  |
| 6.25 | ST20  | 9.49319E-06 | 80.262  |
| 6.3  | ST21  | 9.2451E-06  | 80.422  |
| 6.35 | ST22  | 9.3249E-06  | 75.93   |
| 6.4  | ST23  | 9.26533E-06 | 76.294  |
| 6.45 | ST24  | 8.85747E-06 | 76.256  |
| 6.5  | ST25  | 8.18453E-06 | 79.358  |
| 6.55 | ST26  | 9.06685E-06 | 76.077  |
| 6.6  | ST27  | 1.00343E-05 | 81.543  |
| 6.65 | ST28  | 9.99865E-06 | 80.485  |
| 6.7  | ST29  | 9.89189E-06 | 89.172  |
| 6.75 | ST30  | 9.66032E-06 | 93.129  |
| 6.8  | ST31  | 9.18224E-06 | 80.628  |
| 6.85 | ST32  | 8.43888E-06 | 76.773  |
| 6.9  | ST33  | 8.16577E-06 | 77.667  |
| 6.95 | ST34  | 9.66771E-06 | 84.902  |
| 7    | ST35  | 9.8878E-06  | 91.912  |
| 7.04 | ST36  | 9.753E-06   | 95.607  |
| 7.09 | ST37  | 9.2761E-06  | 79.758  |
| 7.13 | ST38  | 1.0259E-05  | 91.171  |
| 7.18 | ST39  | 8.42434E-06 | 79.047  |
| 7.25 | ST40  | 8.35561E-06 | 115.406 |
| 7.36 | ST41  | 1.14253E-05 | 133.291 |
| 7.46 | ST42  | 1.08799E-05 | 118.286 |
| 7.55 | ST43  | 8.18621E-06 | 79.894  |
| 7.61 | ST44  | 9.47207E-06 | 84.544  |
| 7.65 | ST45  | 1.12552E-05 | 123.898 |
| 7.68 | ST46  | 1.1429E-05  | 108.122 |
| 7.73 | ST47  | 1.16688E-05 | 87.406  |
| 7.8  | ST48  | 9.66985E-06 | 77.31   |
| 7.87 | ST49  | 9.91593E-06 | 83.204  |
| 7.94 | ST50  | 9.97166E-06 | 81.649  |
| 8.01 | ST51  | 1.05895E-05 | 80.943  |
| 8.08 | ST52  | 1.21341E-05 | 85.481  |
| 8.15 | ST53  | 1.17715E-05 | 80.455  |
| 8.22 | ST54  | 1.20708E-05 | 78.955  |
| 8.29 | ST55  | 9.92636E-06 | 79.432  |
| 8.36 | ST56  | 1.04424E-05 | 78.515  |
| 8.45 | ST57  | 1.19055E-05 | 101.533 |
| 8.57 | ST58  | 1.15113E-05 | 108.355 |
| 8.69 | ST59  | 1.30147E-05 | 115.579 |
| 8.79 | ST60  | 9.05865E-06 | 83.944  |
| 8.87 | ST61  | 8.86627E-06 | 85.592  |
| 8.95 | ST62  | 1.09825E-05 | 99.824  |
| 9.02 | ST63  | 1.06115E-05 | 114.458 |
| 9.09 | ST64  | 1.09077E-05 | 119.076 |
| 9.16 | ST189 | 1.07877E-05 | 88.14   |
| 9.22 | ST190 | 9.46597E-06 | 85.508  |
| 9.28 | ST191 | 8.97564E-06 | 91.347  |
| 9.33 | ST192 | 1.18215E-05 | 128.457 |
| 9.38 | ST193 | 1.19446E-05 | 122.547 |
| 9.43 | ST194 | 1.09268E-05 | 115.89  |
| 9.51 | ST195 | 1.23776E-05 | 107.021 |
| 9.58 | ST196 | 1.00012E-05 | 91.934  |
| 9.65 | ST197 | 8.18969E-06 | 83.05   |

|       |         |             |         |
|-------|---------|-------------|---------|
| 9.72  | ST198   | 1.22044E-05 | 92.845  |
| 9.78  | ST199   | 1.27715E-05 | 116.819 |
| 9.84  | ST200   | 1.27046E-05 | 115.668 |
| 9.89  | ST201   | 7.93999E-06 | 83.428  |
| 9.94  | ST202   | 7.99671E-06 | 82.552  |
| 9.99  | ST203   | 7.90253E-06 | 82.98   |
| 10.05 | ST204   | 8.24674E-06 | 86.51   |
| 10.1  | ST205   | 8.04087E-06 | 87.778  |
| 10.15 | ST206   | 8.44073E-06 | 91.075  |
| 10.21 | ST207   | 7.58551E-06 | 85.86   |
| 10.26 | ST208   | 7.91025E-06 | 80.533  |
| 10.31 | ST209   | 7.85355E-06 | 75.655  |
| 10.38 | ST65    | 1.1087E-05  | 105.531 |
| 10.43 | ST66    | 1.13005E-05 | 110.721 |
| 10.48 | ST67    | 1.07874E-05 | 114.462 |
| 10.53 | ST68    | 9.89579E-06 | 87.511  |
| 10.58 | ST69    | 7.6928E-06  | 84.417  |
| 10.63 | ST70    | 1.09187E-05 | 120.9   |
| 10.7  | ST71    | 1.1201E-05  | 128.075 |
| 10.77 | ST72    | 1.19598E-05 | 136.735 |
| 10.84 | ST73    | 1.12305E-05 | 130.755 |
| 10.89 | ST74    | 1.09638E-05 | 113.094 |
| 10.94 | ST75    | 8.06623E-06 | 84.837  |
| 10.98 | ST76    | 6.26965E-06 | 82.936  |
| 11.04 | ST77    | 1.11663E-05 | 114.485 |
| 11.1  | ST78    | 1.14269E-05 | 120.731 |
| 11.16 | ST79    | 1.25556E-05 | 104.451 |
| 11.23 | ST80    | 9.53234E-06 | 96.407  |
| 11.27 | ST81    | 7.39764E-06 | 77.815  |
| 11.31 | ST82    | 6.38315E-06 | 78.569  |
| 11.37 | ST83    | 8.75142E-06 | 152.745 |
| 11.47 | ST84    | 1.01356E-05 | 143.102 |
| 11.57 | ST85    | 9.27965E-06 | 136.267 |
| 11.66 | ST86    | 1.28295E-05 | 129.376 |
| 11.73 | ST87    | 1.01102E-05 | 88.858  |
| 11.79 | ST88    | 7.61266E-06 | 77.67   |
| 11.85 | ST89    | 8.5893E-06  | 85.953  |
| 11.91 | ST90    | 1.28525E-05 | 136.919 |
| 11.97 | ST91    | 1.30793E-05 | 140.868 |
| 12.03 | ST92    | 1.113E-05   | 137.7   |
| 12.09 | ST93    | 9.73047E-06 | 104.51  |
| 12.14 | ST94    | 9.13617E-06 | 88.701  |
| 12.19 | ST95    | 7.70385E-06 | 104.078 |
| 12.25 | ST96    | 1.12064E-05 | 133.795 |
| 12.31 | ST97    | 1.17248E-05 | 142.358 |
| 12.37 | ST98    | 1.18798E-05 | 125.803 |
| 12.44 | ST18M2  | 1.09935E-05 | 107.727 |
| 12.5  | ST18M3  | 9.00156E-06 | 81.912  |
| 12.56 | ST18M4  | 1.13864E-05 | 71.278  |
| 12.63 | ST18L2  | 1.22484E-05 | 138.899 |
| 12.69 | ST18L3  | 1.16443E-05 | 129.432 |
| 12.75 | ST18L4  | 1.05336E-05 | 123.85  |
| 12.82 | ST19MA2 | 8.28635E-06 | 100.254 |
| 12.88 | ST19MA3 | 8.07623E-06 | 75.848  |
| 12.94 | ST19MA4 | 9.72744E-06 | 85.176  |
| 13.01 | ST19LA2 | 1.19423E-05 | 79.168  |

|       |         |             |         |
|-------|---------|-------------|---------|
| 13.07 | ST19LA3 | 1.17094E-05 | 86.651  |
| 13.13 | ST19LA4 | 1.13249E-05 | 80.423  |
| 13.2  | ST19MB2 | 1.10742E-05 | 79.779  |
| 13.27 | ST19MB3 | 1.03205E-05 | 77.346  |
| 13.34 | ST19MB4 | 1.10632E-05 | 81.087  |
| 13.4  | ST19LB2 | 1.15623E-05 | 83.508  |
| 13.46 | ST19LB3 | 1.35367E-05 | 87.163  |
| 13.52 | ST19LB4 | 1.16045E-05 | 92.032  |
| 13.59 | ST19CM2 | 1.09047E-05 | 79.679  |
| 13.65 | ST19CM3 | 9.17935E-06 | 78.186  |
| 13.71 | ST19CM4 | 1.04711E-05 | 79.741  |
| 13.79 | ST19LC2 | 1.1808E-05  | 112.776 |
| 13.87 | ST19LC3 | 1.31122E-05 | 118.66  |
| 13.95 | ST19LC4 | 1.04412E-05 | 128.651 |
| 14.01 | ST20M1  | 8.56562E-06 | 109.035 |
| 14.04 | ST20M2  | 6.88485E-06 | 83.838  |
| 14.07 | ST20M3  | 8.40984E-06 | 96.422  |
| 14.12 | ST20L2  | 8.95915E-06 | 126.716 |
| 14.17 | ST20L3  | 9.93804E-06 | 134.469 |
| 14.22 | ST20L4  | 8.24838E-06 | 127.525 |
| 14.28 | ST21M2  | 1.15677E-05 | 94.24   |
| 14.35 | ST21M3  | 8.66368E-06 | 73.626  |
| 14.42 | ST21M4  | 9.02189E-06 | 82.293  |
| 14.49 | ST21L2  | 1.19172E-05 | 123.862 |
| 14.54 | ST21L3  | 1.26382E-05 | 131.778 |
| 14.59 | ST21L4  | 9.96197E-06 | 130.698 |
| 14.67 | ST22MA2 | 9.32953E-06 | 94.412  |
| 14.74 | ST22MA4 | 8.53489E-06 | 78.651  |
| 14.81 | ST22MA5 | 9.66145E-06 | 74.388  |
| 14.86 | ST22LA2 | 1.22212E-05 | 100.578 |
| 14.89 | ST22LA3 | 1.30771E-05 | 98.638  |
| 14.92 | ST22LA4 | 1.29555E-05 | 96.336  |
| 14.98 | ST22MB3 | 1.17551E-05 | 88.162  |
| 15.08 | ST22MB5 | 1.0528E-05  | 87.358  |
| 15.18 | ST22MB7 | 1.12813E-05 | 83.946  |
| 15.25 | ST22LB2 | 1.10754E-05 | 111.741 |
| 15.28 | ST22LB3 | 1.30442E-05 | 111.783 |
| 15.31 | ST22LB4 | 1.16427E-05 | 102.544 |
| 15.36 | ST22MC1 | 1.15868E-05 | 89.71   |
| 15.43 | ST22MC2 | 1.0525E-05  | 88.209  |
| 15.5  | ST22MC3 | no data     | 88.811  |
| 15.55 | ST22LC1 | no data     | 117.445 |
| 15.58 | ST22LC2 | 1.10233E-05 | 128.805 |
| 15.66 | ST22LC3 | 1.36293E-05 | 132.062 |
| 15.73 | ST22LC4 | 9.63581E-06 | 136.777 |
| 15.79 | 240     | 1.03203E-05 | 85.79   |
| 15.85 | 241     | 9.10531E-06 | 83.815  |
| 15.91 | 242     | 1.07087E-05 | 80.945  |
| 15.97 | 243     | 1.03059E-05 | 106.976 |
| 16.02 | 244     | 1.19769E-05 | 111.713 |
| 16.07 | 245     | 1.12663E-05 | 105.761 |
| 16.14 | 246     | 9.73822E-06 | 87.226  |
| 16.22 | 247     | 8.64768E-06 | 79.015  |
| 16.3  | 248     | 6.4875E-06  | 77.376  |
| 16.35 | 249     | 9.0188E-06  | 81.829  |
| 16.4  | 250     | 1.10888E-05 | 112.454 |

|       |         |             |         |
|-------|---------|-------------|---------|
| 16.45 | 251     | 1.08155E-05 | 114.033 |
| 16.5  | 252     | 1.00186E-05 | 93.459  |
| 16.55 | 253     | 9.81145E-06 | 83.411  |
| 16.6  | 254     | 9.68022E-06 | 80.324  |
| 16.65 | 255     | 1.05962E-05 | 84.825  |
| 16.7  | 256     | 1.00006E-05 | 80.944  |
| 16.75 | 257     | 1.2269E-05  | 86.286  |
| 16.8  | 258     | 1.17738E-05 | 86.618  |
| 16.85 | 259     | 1.05164E-05 | 82.71   |
| 16.9  | 260     | 1.13241E-05 | 80.845  |
| 16.95 | 261     | 1.10792E-05 | 81.754  |
| 17    | 262     | 1.13184E-05 | 81.712  |
| 17.05 | 263     | 1.17266E-05 | 90.586  |
| 17.1  | 264     | 1.10982E-05 | 92.71   |
| 17.15 | ST24MC3 | no data     | 90.243  |
| 17.19 | ST24L2  | 0.00001     | 113.907 |
| 17.25 | ST24L3  | 1.10792E-05 | 119.58  |
| 17.31 | ST24L4  | 8.50817E-06 | 121.363 |
| 17.38 | ST268   | 9.66138E-06 | 109.906 |
| 17.46 | ST269   | 7.2209E-06  | 92.909  |
| 17.54 | ST270   | 7.21123E-06 | 122.941 |
| 17.6  | ST271   | 7.29711E-06 | 112.022 |
| 17.63 | ST272   | 9.57486E-06 | 123.841 |
| 17.66 | ST273   | 9.20332E-06 | 118.406 |
| 17.73 | ST274   | 1.0908E-05  | 107.153 |
| 17.85 | ST275   | 8.00115E-06 | 95.81   |
| 17.97 | ST276   | 9.087E-06   | 96.681  |
| 18.06 | ST277   | 8.18191E-06 | 94.385  |
| 18.09 | ST278   | 1.14392E-05 | 115.114 |
| 18.12 | ST279   | 1.11452E-05 | 120.122 |
| 18.16 | ST280   | 8.18408E-06 | 106.191 |
| 18.21 | ST281   | 7.43684E-06 | 131.074 |
| 18.26 | ST282   | 7.98852E-06 | 136.491 |
| 18.32 | ST283   | 7.36964E-06 | 123.721 |
| 18.35 | ST284   | 1.26534E-05 | 137.742 |
| 18.38 | ST285   | 8.02415E-06 | 137.483 |
| 18.42 | ST286   | 9.12466E-06 | 139.475 |
| 18.47 | ST287   | 7.68197E-06 | 138.792 |
| 18.52 | ST288   | 1.03082E-05 | 141.194 |
| 18.6  | ST289   | 7.86406E-06 | 143.401 |
| 18.7  | ST290   | 8.09692E-06 | 145.393 |
| 18.78 | ST291   | 9.66814E-06 | 131.594 |
| 18.83 | ST292   | 7.86432E-06 | 104.158 |
| 18.88 | ST293   | 9.21539E-06 | 138.488 |
| 18.94 | ST294   | 8.22598E-06 | 137.03  |
| 19.01 | ST295   | 9.40489E-06 | 139.943 |
| 19.08 | ST296   | 1.00384E-05 | 121.654 |
| 19.16 | ST297   | 8.08786E-06 | 104.215 |
| 19.24 | ST298   | 7.93829E-06 | 100.848 |
| 19.31 | ST299   | 1.08363E-05 | 135.918 |
| 19.38 | ST300   | 1.1977E-05  | 142.815 |
| 19.45 | ST301   | 8.61761E-06 | 138.217 |
| 19.52 | ST302   | 9.79555E-06 | 148.616 |
| 19.58 | ST303   | 1.00304E-05 | 105.657 |
| 19.64 | ST304   | 8.5068E-06  | 84.758  |
| 19.71 | ST305   | 1.0782E-05  | 100.607 |

|       |       |             |         |
|-------|-------|-------------|---------|
| 19.78 | ST306 | 1.26806E-05 | 122.273 |
| 19.87 | ST307 | 1.18391E-05 | 113.48  |
| 19.95 | ST308 | 8.68172E-06 | 88.704  |
| 20.03 | ST309 | 8.42959E-06 | 81.464  |
| 20.11 | ST310 | 1.1565E-05  | 127.869 |
| 20.19 | ST311 | 9.0031E-06  | 139.74  |
| 20.24 | ST312 | 1.16767E-05 | 131.266 |
| 20.27 | ST313 | 1.02706E-05 | 102.468 |
| 20.3  | ST314 | 9.10602E-06 | 82.365  |
| 20.37 | ST315 | 1.02091E-05 | 145.283 |
| 20.46 | ST316 | 1.23915E-05 | 158.989 |
| 20.55 | ST317 | 9.06889E-06 | 147.858 |
| 20.63 | ST318 | 1.06683E-05 | 122.359 |
| 20.7  | ST319 | 8.84106E-06 | 90.673  |
| 20.77 | ST320 | 8.47331E-06 | 89.228  |
| 20.83 | ST321 | 9.28094E-06 | 95.702  |
| 20.88 | ST322 | 1.21715E-05 | 127.544 |
| 20.93 | ST323 | 1.05003E-05 | 114.968 |
| 21.01 | ST324 | 9.09551E-06 | 101.088 |
| 21.1  | ST325 | 8.57903E-06 | 84.141  |
| 21.19 | ST326 | 9.14246E-06 | 80.179  |
| 21.26 | ST327 | 1.1917E-05  | 102.259 |
| 21.3  | ST328 | 8.46159E-06 | 139.61  |
| 21.34 | ST329 | 1.10946E-05 | 123.08  |
| 21.39 | ST330 | 9.67204E-06 | 90.013  |
| 21.46 | ST331 | 7.9265E-06  | 75.234  |
| 21.53 | ST332 | 6.81239E-06 | 76.673  |
| 21.61 | ST333 | 1.16855E-05 | 140.002 |
| 21.69 | ST334 | 1.45418E-05 | 147.725 |
| 21.78 | ST335 | 8.59826E-06 | 137.585 |
| 21.84 | ST336 | 1.13629E-05 | 102.931 |
| 21.89 | ST337 | 9.75887E-06 | 91.144  |
| 21.94 | ST338 | 8.72187E-06 | 72.726  |
| 22    | ST339 | 1.10461E-05 | 89.264  |
| 22.06 | ST340 | 1.30876E-05 | 84.428  |
| 22.11 | ST341 | 1.17539E-05 | 110.752 |
| 22.19 | ST342 | 9.23814E-06 | 82.476  |
| 22.26 | ST343 | 9.01362E-06 | 81.369  |
| 22.33 | ST344 | 1.06887E-05 | 84.002  |
| 22.4  | ST345 | 1.11698E-05 | 84.704  |
| 22.44 | ST346 | 1.34191E-05 | 109.739 |
| 22.48 | ST347 | 1.28092E-05 | 110.236 |

Table S2. Bed thickness and limestone-marl thickness ratio of each couplet of the Santiurde interval studied in detail. Stratigraphic location of the samples and their whole-rock mineralogy and organic geochemistry

| Bed     | Strat high (m) | Bed thickness (cm) | L/M ratio | Whole-rock mineralogy |        |          |         |           |         | Organic geochemistry |                                        |                   |                                        |
|---------|----------------|--------------------|-----------|-----------------------|--------|----------|---------|-----------|---------|----------------------|----------------------------------------|-------------------|----------------------------------------|
|         |                |                    |           | %Quartz               | %Clays | %Calcite | %Gypsum | %Dolomite | %Pyrite | %N <sub>org</sub>    | $\delta^{15}\text{N}_{\text{org}}$ (‰) | %C <sub>org</sub> | $\delta^{13}\text{C}_{\text{org}}$ (‰) |
| ST 18M  | 12.5           | 20                 | 0.95      | 13                    | 41     | 36       | 1       | 0         | 9       | 0.07                 | 2.63                                   | 1.94              | -28.90                                 |
| ST 18L  | 12.69          | 19                 |           | 5                     | 9      | 83       | 0       | 0         | 3       | 0.02                 | 2.05                                   | 0.38              | -27.79                                 |
| ST 18AM | 12.88          | 19                 | 1.00      | 13                    | 44     | 33       | 1       | 0         | 9       | 0.09                 | 3.09                                   | 2.86              | -29.00                                 |
| ST 18AL | 13.07          | 19                 |           | 9                     | 32     | 57       | 0       | 0         | 2       | 0.06                 | 1.69                                   | 2.78              | -28.74                                 |
| ST 18BM | 13.27          | 20                 | 0.95      | 10                    | 35     | 45       | 1       | 0.5       | 9       | 0.08                 | 2.76                                   | 3.30              | -29.17                                 |
| ST 18BL | 13.46          | 19                 |           | 9                     | 25     | 61       | 0       | 1         | 4       | 0.05                 | 2.00                                   | 1.63              | -28.29                                 |
| ST 19M  | 13.65          | 20                 | 1.15      | 11                    | 40     | 44       | 1       | 0         | 4       | 0.07                 | 2.90                                   | 2.84              | -29.27                                 |
| ST 19L  | 13.87          | 23                 |           | 3                     | 11     | 84       | 0       | 0         | 2       | 0.02                 | 1.05                                   | 0.30              | -27.64                                 |
| ST 20M  | 14.04          | 11                 | 1.36      | 12                    | 50     | 28       | 0       | 4         | 6       | 0.09                 | 3.11                                   | 2.54              | -29.14                                 |
| ST 20L  | 14.17          | 15                 |           | 3                     | 13     | 82       | 0       | 0         | 2       | 0.02                 | 2.44                                   | 0.26              | -27.22                                 |
| ST 21M  | 14.35          | 21                 | 0.81      | 12                    | 45     | 32       | 1       | 2         | 8       | 0.09                 | 3.18                                   | 3.41              | -29.56                                 |
| ST 21L  | 14.54          | 17                 |           | 4                     | 15     | 79       | 0       | 0         | 2       | 0.02                 | 2.78                                   | 0.30              | -27.68                                 |
| ST 21AM | 14.74          | 22                 | 0.36      | 10                    | 37     | 44       | 0.5     | 2         | 7       | 0.08                 | 3.21                                   | 4.03              | -29.48                                 |
| ST 21AL | 14.89          | 8                  |           | 10                    | 29     | 55       | 0       | 2         | 4       | 0.04                 | 1.90                                   | 1.00              | -27.78                                 |
| ST 21BM | 15.08          | 30                 | 0.33      | 9                     | 43     | 48       | 0.5     | 0         | 0.5     | 0.07                 | 2.95                                   | 2.30              | -28.91                                 |
| ST 21BL | 15.28          | 10                 |           | 10                    | 30     | 54       | 0       | 2         | 4       | 0.04                 | 2.07                                   | 1.02              | -28.03                                 |
| ST 22M  | 15.43          | 20                 | 1.15      | 10                    | 47     | 38       | 0       | 2         | 3       | 0.07                 | 2.80                                   | 2.35              | -29.21                                 |
| ST 22L  | 15.73          | 23                 |           | 3                     | 14     | 81       | 0       | 0         | 2       | 0.02                 | 1.96                                   | 0.37              | -27.95                                 |
| ST 22AM | 15.85          | 19                 |           | 12                    | 48     | 36       | 0       | 0         | 4       | 0.08                 | 2.96                                   | 2.58              | -29.05                                 |



Table S3. Stratigraphic location of the Santiurde samples and their %CaCO<sub>3</sub>, δ<sup>13</sup>C<sub>carb</sub> and δ<sup>18</sup>O<sub>carb</sub> values.

| Strat general (m) | Sample code | CaCO <sub>3</sub> (%) | δ <sup>13</sup> C <sub>carb</sub> (‰) | δ <sup>18</sup> O <sub>carb</sub> (‰) |
|-------------------|-------------|-----------------------|---------------------------------------|---------------------------------------|
| 12.44             | ST18M2      | 41.14                 | -0.298                                | -5.504                                |
| 12.5              | ST18M3      | 27.35                 | -0.029                                | -5.351                                |
| 12.56             | ST18M4      | 29.33                 | 0.696                                 | -5.562                                |
| 12.63             | ST18L2      | 78.76                 | -1.495                                | -5.376                                |
| 12.69             | ST18L3      | 88.97                 | -0.753                                | -5.75                                 |
| 12.75             | ST18L4      | 77.84                 | -0.577                                | -5.663                                |
| 12.82             | ST19MA2     | 30.6                  | -0.355                                | -5.668                                |
| 12.88             | ST19MA3     | 24.63                 | -0.174                                | -5.453                                |
| 12.94             | ST19MA4     | 28.33                 | -0.105                                | -5.574                                |
| 13.01             | ST19LA2     | 32.26                 | -0.07                                 | -5.498                                |
| 13.07             | ST19LA3     | 48.41                 | 0.031                                 | -5.477                                |
| 13.13             | ST19LA4     | 42.91                 | -0.016                                | -5.246                                |
| 13.2              | ST19MB2     | 34.69                 | -0.237                                | -5.673                                |
| 13.27             | ST19MB3     | 37.07                 | 0.001                                 | -5.535                                |
| 13.34             | ST19MB4     | 38.37                 | -0.057                                | -5.547                                |
| 13.4              | ST19LB2     | 56.42                 | -0.031                                | -5.497                                |
| 13.46             | ST19LB3     | 55.78                 | 0.008                                 | -5.398                                |
| 13.52             | ST19LB4     | 57.05                 | -0.211                                | -5.487                                |
| 13.59             | ST19CM2     | 43.05                 | -0.183                                | -5.492                                |
| 13.65             | ST19CM3     | 36.17                 | 0.026                                 | -5.594                                |
| 13.71             | ST19CM4     | 45.33                 | -0.034                                | -5.291                                |
| 13.79             | ST19LC2     | 50.09                 | -0.767                                | -5.698                                |
| 13.87             | ST19LC3     | 81.97                 | -1.093                                | -5.451                                |
| 13.95             | ST19LC4     | 78.53                 | -0.612                                | -5.664                                |
| 14.01             | ST20M1      | 35.91                 | -0.292                                | -5.555                                |
| 14.04             | ST20M2      | 26.05                 | -0.444                                | -5.416                                |
| 14.07             | ST20M3      | 40.47                 | -0.088                                | -5.407                                |
| 14.12             | ST20L2      | 81.83                 | -1.015                                | -5.649                                |
| 14.17             | ST20L3      | 81.59                 | -1.026                                | -5.658                                |
| 14.22             | ST20L4      | 77.23                 | -0.549                                | -5.649                                |
| 14.28             | ST21M2      | 33.83                 | -0.163                                | -5.578                                |
| 14.35             | ST21M3      | 27.72                 | -0.252                                | -5.474                                |
| 14.42             | ST21M4      | 43.21                 | -0.428                                | -5.649                                |
| 14.49             | ST21L2      | 77.36                 | -0.647                                | -5.53                                 |
| 14.54             | ST21L3      | 81.56                 | -0.538                                | -5.723                                |
| 14.59             | ST21L4      | 79.92                 | -0.468                                | -5.643                                |
| 14.67             | ST22MA2     | 30.78                 | -0.111                                | -5.42                                 |
| 14.74             | ST22MA4     | 30.2                  | -0.008                                | -5.333                                |
| 14.81             | ST22MA5     | 42.58                 | -0.199                                | -5.588                                |
| 14.86             | ST22LA2     | 51.77                 | -0.115                                | -5.613                                |
| 14.89             | ST22LA3     | 53.1                  | -0.027                                | -5.403                                |
| 14.92             | ST22LA4     | 52.34                 | -0.091                                | -5.504                                |
| 14.98             | ST22MB3     | 40.04                 | 0.167                                 | -5.436                                |

|       |         |       |        |        |
|-------|---------|-------|--------|--------|
| 15.08 | ST22MB5 | 38.64 | 0.137  | -5.422 |
| 15.18 | ST22MB7 | 40.07 | -0.113 | -5.466 |
| 15.25 | ST22LB2 | 58.89 | -0.239 | -5.541 |
| 15.28 | ST22LB3 | 56.07 | -0.178 | -5.552 |
| 15.31 | ST22LB4 | 45.23 | -0.036 | -5.429 |
| 15.36 | ST22MC1 | 31.83 | 0.425  | -5.399 |
| 15.43 | ST22MC2 | 31.41 | 0.107  | -5.546 |
| 15.5  | ST22MC3 | 40.66 | -0.036 | -5.289 |
| 15.58 | ST22LC2 | 83.26 | -0.746 | -5.843 |
| 15.66 | ST22LC3 | 82.17 | -0.951 | -5.598 |
| 15.73 | ST22LC4 | 80.43 | -1.092 | -5.727 |
| 15.79 | ST22AM2 | 31.42 | 0.248  | -5.373 |
| 15.85 | ST22AM3 | 31.45 | 0.355  | -5.302 |
| 15.91 | ST22AM4 | 33.41 | 0.365  | -5.256 |

Table S4. Stratigraphic location of the Santiurde samples and their major and trace element content

| Bed                     | Strat high (m) | SiO <sub>2</sub> | TiO <sub>2</sub> | Al <sub>2</sub> O <sub>3</sub> | CaO   | Fe <sub>2</sub> O <sub>3</sub> | K <sub>2</sub> O | MgO  | MnO  | Na <sub>2</sub> O | P <sub>2</sub> O <sub>5</sub> | LOI  | Co   | Cr   | Cu   | Ni   | Sr   | V    | Zn   |
|-------------------------|----------------|------------------|------------------|--------------------------------|-------|--------------------------------|------------------|------|------|-------------------|-------------------------------|------|------|------|------|------|------|------|------|
|                         |                | %                | %                | %                              | %     | %                              | %                | %    | %    | %                 | %                             | %    | %    | ppm  | ppm  | ppm  | ppm  | ppm  | ppm  |
| ST 18M                  | 12.5           | 31.63            | 0.54             | 14.07                          | 19.43 | 6.23                           | 3.33             | 1.53 | 0.02 | 0.66              | 0.13                          | 22.9 | 11.0 | 78.3 | 88.4 | 62.0 | 392  | 156  | 981  |
| ST 18L                  | 12.69          | 9.39             | 0.18             | 5.41                           | 44.50 | 3.42                           | 0.36             | 0.98 | 0.02 | 0.15              | 0.05                          | 35.4 | 2.44 | 31.5 | 26.5 | 10.7 | 380  | 35.0 | 11.5 |
| ST 18AM                 | 12.88          | 32.98            | 0.60             | 15.25                          | 15.73 | 6.27                           | 3.87             | 1.91 | 0.02 | 0.52              | 0.12                          | 22.9 | 11.3 | 99.3 | 68.7 | 67.7 | 398  | 206  | 298  |
| ST 18AL                 | 13.07          | 22.43            | 0.38             | 11.81                          | 27.99 | 4.51                           | 1.93             | 1.58 | 0.02 | 0.43              | 0.07                          | 28.7 | 5.27 | 86.3 | 34.0 | 29.9 | 527  | 115  | 34.3 |
| ST 18BM                 | 13.27          | 25.14            | 0.47             | 13.02                          | 23.51 | 5.90                           | 2.89             | 1.82 | 0.03 | 0.46              | 0.11                          | 27.2 | 8.99 | 79.7 | 66.8 | 83.8 | 419  | 235  | 1058 |
| ST 18BL                 | 13.46          | 21.16            | 0.34             | 8.66                           | 31.93 | 4.35                           | 1.62             | 1.65 | 0.02 | 0.46              | 0.07                          | 29.5 | 6.27 | 81.6 | 53.9 | 37.8 | 203  | 101  | 36.5 |
| ST 19M                  | 13.65          | 29.30            | 0.51             | 11.81                          | 22.79 | 5.40                           | 2.88             | 1.79 | 0.03 | 0.67              | 0.11                          | 25.5 | 10.5 | 92.4 | 76.9 | 86.2 | 280  | 247  | 319  |
| ST 19L                  | 13.87          | 7.67             | 0.16             | 4.83                           | 46.19 | 2.92                           | 0.48             | 1.08 | 0.03 | 0.17              | 0.04                          | 36.8 | 2.78 | 29.4 | 27.3 | 16.8 | 298  | 45.1 | 12.7 |
| ST 20M                  | 14.04          | 34.77            | 0.68             | 13.97                          | 14.73 | 6.97                           | 3.79             | 2.42 | 0.03 | 0.56              | 0.17                          | 21.3 | 13.9 | 103  | 87.1 | 71.0 | 336  | 219  | 281  |
| ST 20L                  | 14.17          | 8.02             | 0.18             | 5.34                           | 46.34 | 3.16                           | 0.37             | 1.08 | 0.03 | 0.14              | 0.04                          | 36.2 | 3.29 | 30.6 | 17.3 | 15.1 | 327  | 37.8 | 12.3 |
| ST 21M                  | 14.35          | 2.70             | 0.02             | 0.52                           | 68.97 | 0.30                           | 0.10             | 3.70 | 0.01 | 0.05              | 0.03                          | 24.3 | <LMD | 8.4  | 8.08 | 9.28 | 684  | 9.8  | 34.7 |
| ST 21L                  | 14.54          | 8.89             | 0.18             | 5.64                           | 44.72 | 3.25                           | 0.35             | 1.15 | 0.03 | 0.17              | 0.06                          | 35.6 | 3.02 | 33.0 | 21.6 | 13.4 | 421  | 47.6 | 15.7 |
| ST 21AM                 | 14.74          | 25.56            | 0.44             | 11.49                          | 23.40 | 6.16                           | 2.57             | 1.75 | 0.03 | 0.58              | 0.12                          | 27.6 | 9.08 | 87.7 | 94.4 | 97.7 | 383  | 240  | 358  |
| ST 21AL                 | 14.89          | 22.26            | 0.38             | 11.21                          | 29.34 | 5.14                           | 1.89             | 1.85 | 0.03 | 0.45              | 0.08                          | 27.5 | 5.67 | 73.3 | 42.0 | 24.8 | 592  | 85.3 | 36.4 |
| ST 21BM                 | 15.08          | 26.17            | 0.46             | 12.56                          | 23.99 | 5.06                           | 2.87             | 1.72 | 0.03 | 0.48              | 0.11                          | 26.0 | 8.29 | 88.1 | 56.4 | 43.2 | 434  | 134  | 50.5 |
| ST 21BL                 | 15.28          | 22.10            | 0.37             | 9.73                           | 31.42 | 4.73                           | 1.59             | 1.84 | 0.03 | 0.45              | 0.08                          | 28.5 | 5.78 | 68.5 | 36.2 | 26.1 | 397  | 78.9 | 36.6 |
| ST 22M                  | 15.43          | 29.22            | 0.51             | 12.76                          | 21.18 | 5.11                           | 2.95             | 1.85 | 0.03 | 0.65              | 0.12                          | 25.1 | 8.99 | 86.4 | 64.1 | 49.9 | 432  | 168  | 484  |
| ST 22L                  | 15.73          | 8.38             | 0.17             | 5.32                           | 46.17 | 2.90                           | 0.34             | 1.05 | 0.03 | 0.15              | 0.09                          | 36.4 | 2.54 | 35.5 | 18.4 | 13.1 | 474  | 41.7 | 15.1 |
| ST 22AM                 | 15.85          | 32.41            | 0.55             | 14.11                          | 17.61 | 5.86                           | 3.56             | 1.83 | 0.03 | 0.56              | 0.12                          | 22.8 | 9.68 | 96.1 | 61.0 | 51.2 | 461  | 187  | 70.5 |
| <b>LMD (ppb)</b>        |                | 774              | 0.90             | 11.3                           | 188   | 18.5                           | 112              | 2.15 | 0.07 | 15.2              | 64.4                          |      | 1.40 | 2.92 | 57.0 | 44.6 | 1.30 | 1.17 | 5.94 |
| <b>BCR-2 mean (n=4)</b> |                | 94               | 100              | 99                             | 101   | 98                             | 102              | 97   | 101  | 104               | 84                            |      | 106  | 107  | 93   | 85   | 107  | 105  | 105  |
| <b>ERROR</b>            |                | 0.03             | 0.05             | 0.05                           | 0.04  | 0.04                           | 0.06             | 0.05 | 0.04 | 0.04              | 0.04                          |      | 0.05 | 0.05 | 0.34 | 0.41 | 0.05 | 0.05 | 0.05 |

| Bed                     | Strat high (m) | La   | Ce   | Pr   | Nd   | Sm   | Eu   | Gd   | Tb    | Dy    | Ho    | Er    | Tm    | Yb    | Lu    |
|-------------------------|----------------|------|------|------|------|------|------|------|-------|-------|-------|-------|-------|-------|-------|
|                         |                | ppm   | ppm   | ppm   | ppm   | ppm   | ppm   | ppm   |
| ST 18M                  | 12.5           | 38.4 | 62.9 | 7.62 | 27.0 | 4.93 | 0.97 | 4.41 | 0.66  | 3.82  | 0.64  | 2.16  | 0.38  | 2.38  | 0.43  |
| ST 18L                  | 12.69          | 20.4 | 35.6 | 4.85 | 20.2 | 4.15 | 0.82 | 3.88 | 0.58  | 3.21  | 0.52  | 1.70  | 0.28  | 1.59  | 0.28  |
| ST 18AM                 | 12.88          | 47.0 | 76.6 | 9.33 | 31.8 | 5.38 | 0.97 | 4.92 | 0.73  | 4.19  | 0.71  | 2.45  | 0.45  | 2.79  | 0.49  |
| ST 18AL                 | 13.07          | 29.5 | 51.9 | 6.78 | 26.7 | 5.27 | 1.03 | 4.87 | 0.73  | 4.18  | 0.69  | 2.26  | 0.38  | 2.28  | 0.40  |
| ST 18BM                 | 13.27          | 35.4 | 60.5 | 7.62 | 28.7 | 5.42 | 0.98 | 4.91 | 0.74  | 4.24  | 0.69  | 2.32  | 0.40  | 2.45  | 0.43  |
| ST 18BL                 | 13.46          | 19.8 | 32.5 | 4.31 | 16.7 | 3.25 | 0.70 | 2.91 | 0.44  | 2.47  | 0.41  | 1.36  | 0.23  | 1.40  | 0.24  |
| ST 19M                  | 13.65          | 13.9 | 22.1 | 3.01 | 12.4 | 2.49 | 0.52 | 2.37 | 0.36  | 2.04  | 0.33  | 1.09  | 0.18  | 1.04  | 0.18  |
| ST 19L                  | 13.87          | 35.7 | 55.4 | 6.67 | 22.9 | 3.98 | 0.81 | 3.75 | 0.54  | 3.14  | 0.52  | 1.82  | 0.32  | 1.98  | 0.35  |
| ST 20M                  | 14.04          | 17.7 | 29.1 | 3.97 | 16.4 | 3.30 | 0.65 | 3.08 | 0.46  | 2.62  | 0.44  | 1.44  | 0.23  | 1.35  | 0.24  |
| ST 20L                  | 14.17          | 21.7 | 37.1 | 4.54 | 16.7 | 3.19 | 0.63 | 2.89 | 0.44  | 2.57  | 0.43  | 1.47  | 0.26  | 1.58  | 0.28  |
| ST 21M                  | 14.35          | 33.4 | 55.7 | 7.52 | 31.0 | 6.38 | 1.28 | 5.93 | 0.92  | 5.23  | 0.86  | 2.78  | 0.46  | 2.69  | 0.48  |
| ST 21L                  | 14.54          | 28.7 | 52.0 | 6.97 | 27.5 | 5.52 | 1.06 | 4.96 | 0.77  | 4.39  | 0.71  | 2.34  | 0.40  | 2.36  | 0.41  |
| ST 21AM                 | 14.74          | 18.7 | 33.7 | 4.30 | 17.1 | 3.43 | 0.64 | 3.18 | 0.47  | 2.71  | 0.45  | 1.46  | 0.25  | 1.47  | 0.26  |
| ST 21AL                 | 14.89          | 39.8 | 68.6 | 8.65 | 32.6 | 6.19 | 1.20 | 5.63 | 0.85  | 4.85  | 0.80  | 2.69  | 0.46  | 2.87  | 0.50  |
| ST 21BM                 | 15.08          | 29.7 | 52.6 | 7.04 | 28.1 | 5.60 | 1.11 | 4.90 | 0.75  | 4.24  | 0.69  | 2.30  | 0.39  | 2.37  | 0.41  |
| ST 21BL                 | 15.28          | 33.1 | 55.1 | 6.81 | 24.5 | 4.42 | 0.87 | 4.00 | 0.60  | 3.49  | 0.58  | 1.97  | 0.35  | 2.12  | 0.37  |
| ST 22M                  | 15.43          | 16.2 | 27.3 | 3.86 | 16.4 | 3.43 | 0.74 | 3.26 | 0.49  | 2.73  | 0.45  | 1.42  | 0.23  | 1.34  | 0.24  |
| ST 22L                  | 15.73          | 40.3 | 66.9 | 8.14 | 28.4 | 4.93 | 0.92 | 4.47 | 0.67  | 3.86  | 0.65  | 2.26  | 0.40  | 2.45  | 0.43  |
| ST 22AM                 | 15.85          | 34.1 | 57.1 | 7.05 | 25.5 | 4.57 | 0.88 | 4.21 | 0.63  | 3.69  | 0.61  | 2.07  | 0.36  | 2.23  | 0.39  |
| <b>LMD (ppb)</b>        |                | 0.14 | 0.07 | 0.01 | 0.09 | 0.02 | 0.01 | 0.02 | 0.005 | 0.034 | 0.004 | 0.014 | 0.004 | 0.014 | 0.003 |
| <b>BCR-2 mean (n=4)</b> |                | 103  | 103  | 107  | 109  | 106  | 101  | 95   | 100   | 97    | 96    | 95    | 101   | 94    | 108   |
| <b>ERROR</b>            |                | 0.05 | 0.05 | 0.05 | 0.04 | 0.06 | 0.06 | 0.03 | 0.04  | 0.04  | 0.05  | 0.04  | 0.03  | 0.03  | 0.03  |

Table S5. Factor matrix containing the rotated factor loadings, which are equivalent to the correlation between the variable and the factor. The amount of total variance explained by each factor is also represented. Values in bold exceed 0.65; values in bold and italics are between 0.50 and 0.64.

| Rotated Component Matrix          |              |              |             |              |
|-----------------------------------|--------------|--------------|-------------|--------------|
|                                   | Factor       |              |             |              |
|                                   | 1            | 2            | 3           | 4            |
| % of variance                     | 44.54        | 25.78        | 9.92        | 7.73         |
| Cumulative %                      | 44.54        | 70.32        | 80.24       | 87.97        |
| Ni                                | <b>0.88</b>  | 0.33         | -0.14       | 0.12         |
| Co                                | <b>0.88</b>  | 0.33         | -0.01       | 0.00         |
| Cu                                | <b>0.87</b>  | 0.37         | -0.12       | 0.12         |
| P <sub>2</sub> O <sub>5</sub>     | <b>0.84</b>  | 0.40         | 0.06        | -0.15        |
| V                                 | <b>0.83</b>  | 0.49         | -0.11       | 0.02         |
| %piryte                           | <b>0.79</b>  | 0.09         | 0.11        | 0.42         |
| %C <sub>org</sub>                 | <b>0.70</b>  | <b>0.59</b>  | -0.03       | 0.08         |
| %clays                            | <b>0.66</b>  | <b>0.71</b>  | 0.06        | -0.14        |
| Zn                                | <b>0.64</b>  | 0.20         | 0.04        | <b>0.50</b>  |
| Al <sub>2</sub> O <sub>3</sub>    | <b>0.59</b>  | <b>0.74</b>  | 0.18        | 0.01         |
| Na <sub>2</sub> O                 | 0.43         | <b>0.84</b>  | -0.13       | 0.02         |
| δ <sup>13</sup> C <sub>carb</sub> | 0.17         | <b>0.95</b>  | 0.08        | 0.09         |
| Sr                                | 0.04         | 0.12         | <b>0.89</b> | -0.13        |
| MnO                               | 0.00         | 0.01         | 0.01        | <b>-0.91</b> |
| Ba                                | -0.18        | -0.07        | <b>0.91</b> | 0.16         |
| %calcite                          | <b>-0.73</b> | <b>-0.65</b> | -0.07       | 0.05         |
| δ <sup>13</sup> C <sub>org</sub>  | <b>-0.74</b> | <b>-0.60</b> | 0.09        | -0.08        |
| MS                                | <b>-0.84</b> | -0.19        | 0.16        | 0.05         |
